# Supplementary material for: Dynamic genome wide expression profiling of Drosophila head development reveals a novel role of Hunchback in retinal glia cell development and blood-brain barrier integrity
Source: PLoS Genet. 2018 Jan 23;14(1):e1007180. doi: 10.1371/journal.pgen.1007180 (PMC5796731; doi:10.1371/journal.pgen.1007180)
Supplement: S2 Table — (XLSX) [file pgen.1007180.s008.xlsx]

## Sheet: Sheet1
Cluster	Rank	TF	FeatureID	AUC	NES
cluster1	1	caudal adult	modENCODE-Caudal-AdultFemale-DCC2625	0.0114424	9.57824
cluster1	2	snail	BDTNP-sna_1_081506	0.00637248	3.95683
cluster1	3	bagpipe	Furlong-bap_6_8	0.0060929	3.64684
cluster1	4	bin	Furlong-bin_8_10	0.00579856	3.32048
cluster1	5	ftz	BDTNP-ftz_3_032707	0.00553465	3.02786
cluster2	1	caudal adult	modENCODE-Caudal-AdultFemale-DCC2625	0.0107816	8.12257
cluster2	2	nejire embryo	modENCODE-nejire-Embryos20-24hr-DCC858	0.00774421	4.53929
cluster2	3	mef2	Furlong-mef2_8_10	0.00703771	3.70581
cluster2	4	caudal embryo	modENCODE-Caudal-Embryos4-8hr-DCC2637	0.00677195	3.39229
cluster3	1	nejire embryo	modENCODE-nejire-Embryos20-24hr-DCC858	0.00955731	4.45649
cluster4	1	pnr	Furlong-pnr_6-8_allIPvsallM_log2	0.0273617	9.69982
cluster4	2	pnr	Furlong-pnr_4-6_allIPvsallM_log2	0.026881	9.45837
cluster4	3	TFIIB	BDTNP-TFIIB_1_012406	0.0204875	6.24711
cluster4	4	nejire L1	modENCODE-nejire-LarvaeL1stage-DCC859	0.0193988	5.7003
cluster4	5	med	BDTNP-med_2S14_071206	0.0179825	4.9889
cluster4	6	nejire embryo	modENCODE-nejire-Embryos8-12hr-DCC985	0.0168884	4.43938
cluster4	7	nejire embryo	modENCODE-nejire-Embryos12-16hr-DCC856	0.0161331	4.06
cluster4	8	doc2	Furlong-doc2_6-8_allIPvsallM_log2	0.0151235	3.55294
cluster4	9	mef2	Furlong-mef2_6_8	0.0141705	3.07426
cluster4	10	nejire embryo	modENCODE-nejire-Embryos20-24hr-DCC858	0.0140624	3.01997
cluster4	11	pmad	Furlong-Pmad_6-8_allIPvsallM_log2	0.0140461	3.01177
cluster5	1	EcR	modENCODE-EcR-Whiteprepupae(WPP)30-33hr-DCC2642	0.0149267	5.81797
cluster5	2	EcR	modENCODE-EcR-Pupae,Whiteprepupae(WPP)10-11hr-DCC2641	0.0148586	5.77344
cluster6	1	pnr	Furlong-pnr_4-6_allIPvsallM_log2	0.0299737	10.027
cluster6	2	pnr	Furlong-pnr_6-8_allIPvsallM_log2	0.0290206	9.57881
cluster6	3	TFIIB	BDTNP-TFIIB_1_012406	0.0206924	5.66249
cluster6	4	doc2	Furlong-doc2_6-8_allIPvsallM_log2	0.0193564	5.03424
cluster6	5	pmad	Furlong-Pmad_6-8_allIPvsallM_log2	0.0182518	4.51481
cluster6	6	nejire L1	modENCODE-nejire-LarvaeL1stage-DCC859	0.0182205	4.50008
cluster6	7	bin	Furlong-bin_6_8	0.0161859	3.54332
cluster6	8	nejire embryo	modENCODE-nejire-Embryos8-12hr-DCC985	0.015629	3.28145
cluster6	9	bin	Furlong-bin_10_12	0.015362	3.15589
cluster6	10	med	BDTNP-med_2S14_071206	0.0152498	3.10316
cluster7	1	pnr	Furlong-pnr_6-8_allIPvsallM_log2	0.018505	9.27506
cluster7	2	pnr	Furlong-pnr_4-6_allIPvsallM_log2	0.0183404	9.13408
cluster7	3	pmad	Furlong-Pmad_6-8_allIPvsallM_log2	0.0158103	6.96677
cluster7	4	doc2	Furlong-doc2_6-8_allIPvsallM_log2	0.0129734	4.53663
cluster7	5	doc2	Furlong-doc2_4-6_allIPvsallM_log2	0.0116276	3.38383
cluster7	6	nejire L3	modENCODE-nejire-LarvaeL3stage-DCC860	0.0115509	3.31816
cluster8	1	nejire adult	modENCODE-nejire-AdultMale-DCC863	0.0157878	6.229
cluster8	2	nejire adult	modENCODE-nejire-AdultFemale-DCC862	0.0149852	5.68435
cluster8	3	pnr	Furlong-pnr_6-8_allIPvsallM_log2	0.0129487	4.30226
cluster8	4	pnr	Furlong-pnr_4-6_allIPvsallM_log2	0.012891	4.2631
cluster8	5	nejire pupa	modENCODE-nejire-Pupae-DCC861	0.0124789	3.98342
cluster8	6	nejire L1	modENCODE-nejire-LarvaeL1stage-DCC859	0.0123582	3.90152
cluster8	7	nejire embryo	modENCODE-nejire-Embryos8-12hr-DCC985	0.0121871	3.78543
cluster8	8	nejire L3	modENCODE-nejire-LarvaeL3stage-DCC860	0.0114812	3.30638
cluster8	9	TFIIB	BDTNP-TFIIB_1_012406	0.0111441	3.07759
cluster8	10	nejire embryo	modENCODE-nejire-Embryos20-24hr-DCC858	0.0111347	3.07123
cluster9	1	pnr	Furlong-pnr_4-6_allIPvsallM_log2	0.0115846	5.3114
cluster9	2	pnr	Furlong-pnr_6-8_allIPvsallM_log2	0.0112874	4.97206
cluster9	3	nejire L3	modENCODE-nejire-LarvaeL3stage-DCC860	0.00996166	3.458
cluster9	4	pmad	Furlong-Pmad_6-8_allIPvsallM_log2	0.0098462	3.32613
cluster9	5	nejire adult	modENCODE-nejire-AdultMale-DCC863	0.00974151	3.20657
cluster10	1	nejire L3	modENCODE-nejire-LarvaeL3stage-DCC860	0.0128766	8.31968
cluster10	2	nejire pupa	modENCODE-nejire-Pupae-DCC861	0.0116876	6.66327
cluster10	3	nejire adult	modENCODE-nejire-AdultFemale-DCC862	0.0114736	6.3651
cluster10	4	dl	BDTNP-dl_3_120106	0.0104605	4.95373
cluster10	5	zld	BDTNP-GSM63062_ZLD_3hr	0.00971865	3.92031
cluster10	6	dTCF	Furlong-dTCF_6-8_allIPvsallM_log2	0.00944964	3.54555
cluster10	7	zld	BDTNP-GSM63061_ZLD_2hr	0.00912989	3.10011
cluster10	8	nejire embryo	modENCODE-nejire-Embryos16-20hr-DCC857	0.00910276	3.06232
cluster11	1	pnr	Furlong-pnr_6-8_allIPvsallM_log2	0.0172279	7.91839
cluster11	2	pnr	Furlong-pnr_4-6_allIPvsallM_log2	0.0156875	6.57086
cluster12	1	EcR	modENCODE-EcR-Whiteprepupae(WPP)30-33hr-DCC2642	0.0152819	7.59867
cluster12	2	EcR	modENCODE-EcR-Pupae,Whiteprepupae(WPP)10-11hr-DCC2641	0.0143436	6.8364
cluster12	3	slp1	Furlong-slp1_4-6_allIPvsallM_log2	0.012239	5.12657
cluster12	4	hb	BDTNP-hb_1S9_072607	0.0113628	4.41474
cluster12	5	mef2	Furlong-Mef2_B30_6-8h_H3	0.0109093	4.04634
cluster12	6	nejire pupa	modENCODE-nejire-Pupae-DCC861	0.0108072	3.96335
cluster12	7	slp1	Furlong-slp1_6-8_allIPvsallM_log2	0.0106203	3.81154
cluster12	8	tin	Furlong-tin_4_6	0.010243	3.50496
cluster12	9	twi	BDTNP-twi_2_081506	0.0102293	3.49383
cluster12	10	dTCF	Furlong-dTCF_6-8_allIPvsallM_log2	0.00997366	3.28618
cluster12	11	dTCF	Furlong-dTCF_4-6_allIPvsallM_log2	0.00964198	3.01671
cluster13	1	mad	BDTNP-mad_2_020907	0.00740722	4.38869
cluster13	2	snail	BDTNP-sna_1_081506	0.00732766	4.30504
cluster13	3	run	BDTNP-run_1_020907	0.0066659	3.60927
cluster13	4	EcR	modENCODE-EcR-Whiteprepupae(WPP)30-33hr-DCC2642	0.00657426	3.51292
cluster13	5	da	BDTNP-da_2_050307	0.00632945	3.25553
cluster13	6	run	BDTNP-run_2_020907	0.006251	3.17305
cluster13	7	EcR	modENCODE-EcR-Pupae,Whiteprepupae(WPP)10-11hr-DCC2641	0.00618278	3.10132
cluster13	8	hb	BDTNP-hb_2_092305	0.00608854	3.00223
